# Supplementary material for: Application of an alkali destruction technique and natural deep eutectic solvent for greener extraction from peanut shells: optimization and extraction kinetics study
Source: Royal Society of Chemistry journal article supplement (doi:10.1039/d1ay02033a), 2022-01-01
Supplement: d1ay02033a1.pdf [file d1ay02033a1.pdf]

1 Supplementary material

2 **Application of alkali damage technique and natural deep eutectic solvent for the**  
3 **greener extraction from peanut shells: optimization and kinetic study**

4 Meifeng Deng<sup>a</sup>, Hailong Wang<sup>c, \*</sup>, Shuwen Geng<sup>a</sup>, Xufang Guan<sup>a</sup>, Ning Liang<sup>b, \*</sup>

5

6 <sup>a</sup> *School of Pharmacy, Shenyang Pharmaceutical University, Shenyang, Liaoning*  
7 *Province, 110016, China*

8 <sup>b</sup> *School of Pharmaceutical Engineering, Shenyang Pharmaceutical University,*  
9 *Shenyang, Liaoning Province, 110016, China*

10 <sup>c</sup> *Department of Clinical Epidemiology and Evidence-based Medicine, First Hospital*  
11 *of China Medical University, Shenyang, 110016, China.*

12 **\*Correspondence:**

13 <sup>b</sup>Professor Ning Liang, School of Pharmaceutical Engineering, Shenyang  
14 Pharmaceutical University, Shenyang, Liaoning Province, 110016, P. R. China

15 <sup>c</sup>Professor Hailong Wang, Department of Clinical Epidemiology and Evidence-based  
16 Medicine, First Hospital of China Medical University, Shenyang, 110016, China.

17 **E-mail:** [liangning@syphu.edu.cn](mailto:liangning@syphu.edu.cn); [1059050227@qq.com](mailto:1059050227@qq.com)

18 **Tel./Fax.:** 86-24 43520211; 86-13940526072

19

**Table S1** The accuracy and precision of the proposed method

| Samples extract  | Accuracy<br>(%) | Precision        |                      |
|------------------|-----------------|------------------|----------------------|
|                  |                 | Intra-day<br>(%) | Inter-<br>day<br>(%) |
| Low<br>(50%)     | 98.10           | 1.27             | 1.34                 |
| Medium<br>(100%) | 99.80           | 0.91             | 1.36                 |
| High<br>(150%)   | 98.33           | 0.66             | 0.83                 |

23 **Table S2** Flavonoids concentration (mg RE/mL) in the Me/LA extract at different  
 24 times and temperatures

| Extraction<br>on time<br>(min) | Extraction temperature (°C) |                   |                   |                   |                   |
|--------------------------------|-----------------------------|-------------------|-------------------|-------------------|-------------------|
|                                | 60                          | 65                | 70                | 75                | 80                |
| 65                             | 0.3650±0.00<br>12           | 0.4057±0.01<br>01 | 0.4704±0.00<br>41 | 0.5245±0.00<br>09 | 0.5530±0.00<br>45 |
| 75                             | 0.3790±0.00<br>14           | 0.4204±0.00<br>27 | 0.4919±0.00<br>57 | 0.5419±0.00<br>37 | 0.5642±0.00<br>39 |
| 85                             | 0.3876±0.00<br>46           | 0.4292±0.00<br>71 | 0.5041±0.00<br>26 | 0.5563±0.00<br>73 | 0.5696±0.01<br>41 |
| 95                             | 0.3968±0.01<br>16           | 0.4339±0.00<br>58 | 0.5175±0.00<br>34 | 0.5624±0.01<br>27 | 0.5729±0.00<br>74 |
| 105                            | 0.4031±0.01<br>09           | 0.4374±0.00<br>48 | 0.5241±0.00<br>61 | 0.5667±0.00<br>45 | 0.5753±0.00<br>47 |
| 115                            | 0.4169±0.00<br>92           | 0.4450±0.00<br>71 | 0.5351±0.00<br>25 | 0.5734±0.00<br>78 | 0.5771±0.00<br>62 |

25

26

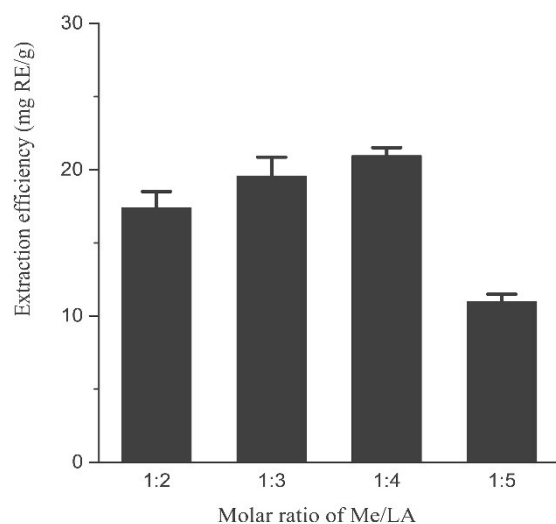

27

28 **Fig. S1** Effects of different molar ratios of Me/LA on the extraction efficiency of

29

flavonoids from peanut shells in ultrasonic extraction.

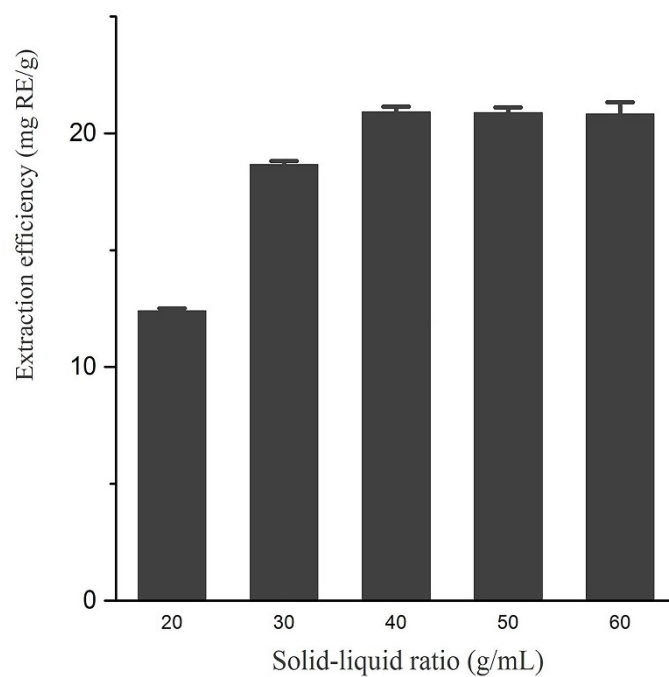

30

31 **Fig. S2** Effect of solid-liquid ratio on extraction efficiency of flavonoids from peanut

32

shells in ultrasonic extraction.

33

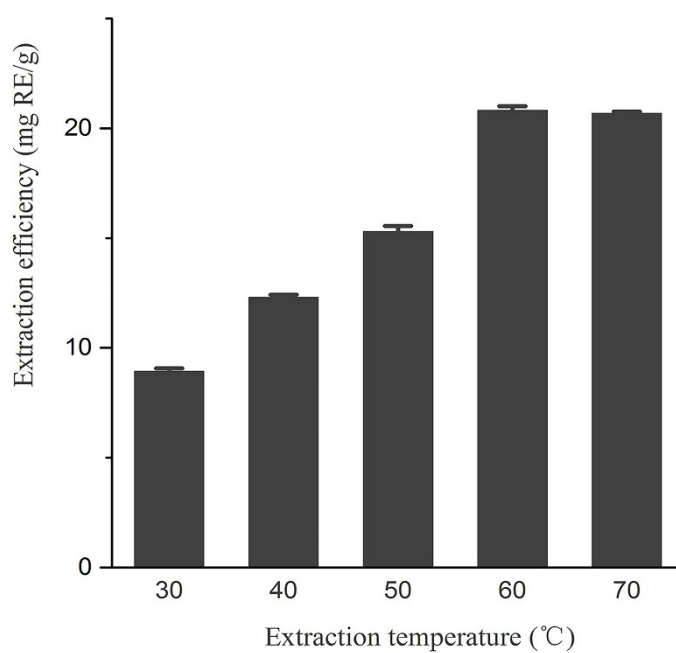

34

35 **Fig. S3** Effect of extraction temperature on extraction efficiency of flavonoids from  
 36 peanut shells in ultrasonic extraction.

37

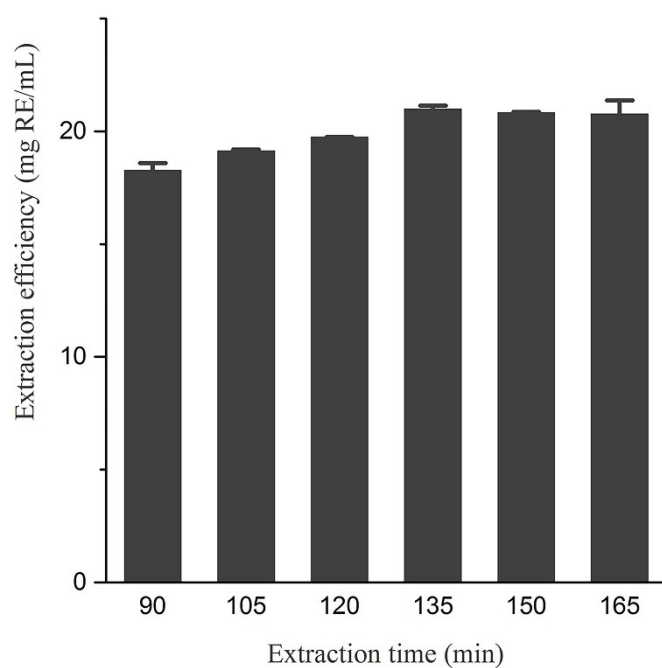

38

39 **Fig. S4** Effect of extraction time on extraction efficiency of flavonoids from peanut  
 40 shells in ultrasonic extraction.

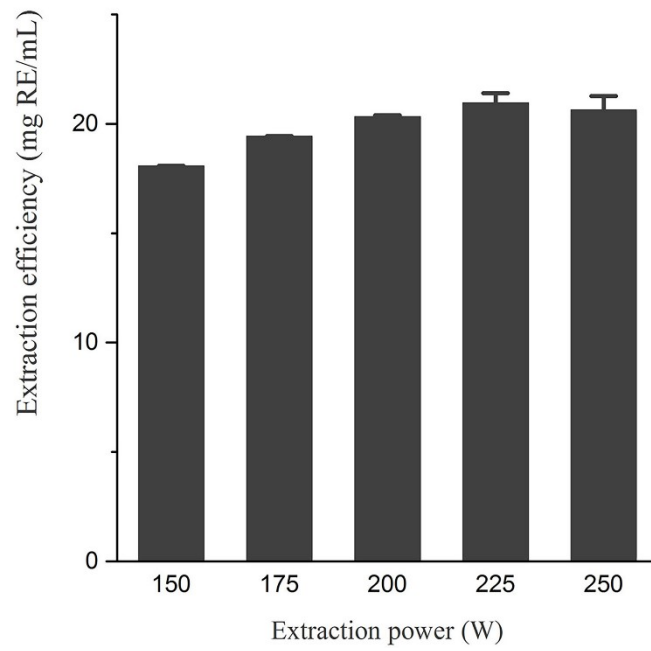

41

42 **Fig. S5** Effect of extraction power on extraction efficiency of flavonoids from peanut

43

shells in ultrasonic extraction.

44

45
